# Supplementary material for: Methyl-donor depletion of head and neck cancer cells in vitro establishes a less aggressive tumour cell phenotype
Source: Springer Nature journal article supplement (doi:10.1007/s00394-017-1411-5), 2017-03-01
Supplement: MOESM1 [file 12104666]

## **Methyl-donor depletion of head and neck cancer cells *in vitro* establishes a less aggressive tumour cell phenotype**

Vanessa Hearnden<sup>1,2</sup>, Hilary J. Powers<sup>1</sup>, Abeir Elmogassabi<sup>1</sup>,  
Rosanna Lowe<sup>1</sup>, Craig Murdoch<sup>2\*</sup>

<sup>1</sup> Human Nutrition Unit, Department of Oncology, University of Sheffield, Sheffield, S10 2RX, UK

<sup>2</sup> School of Clinical Dentistry, University of Sheffield, Sheffield, S10 2TA, UK

\* **Corresponding author:** Craig Murdoch; **E-mail:** [c.murdoch@sheffield.ac.uk](mailto:c.murdoch@sheffield.ac.uk)

# Supplementary Figure 1

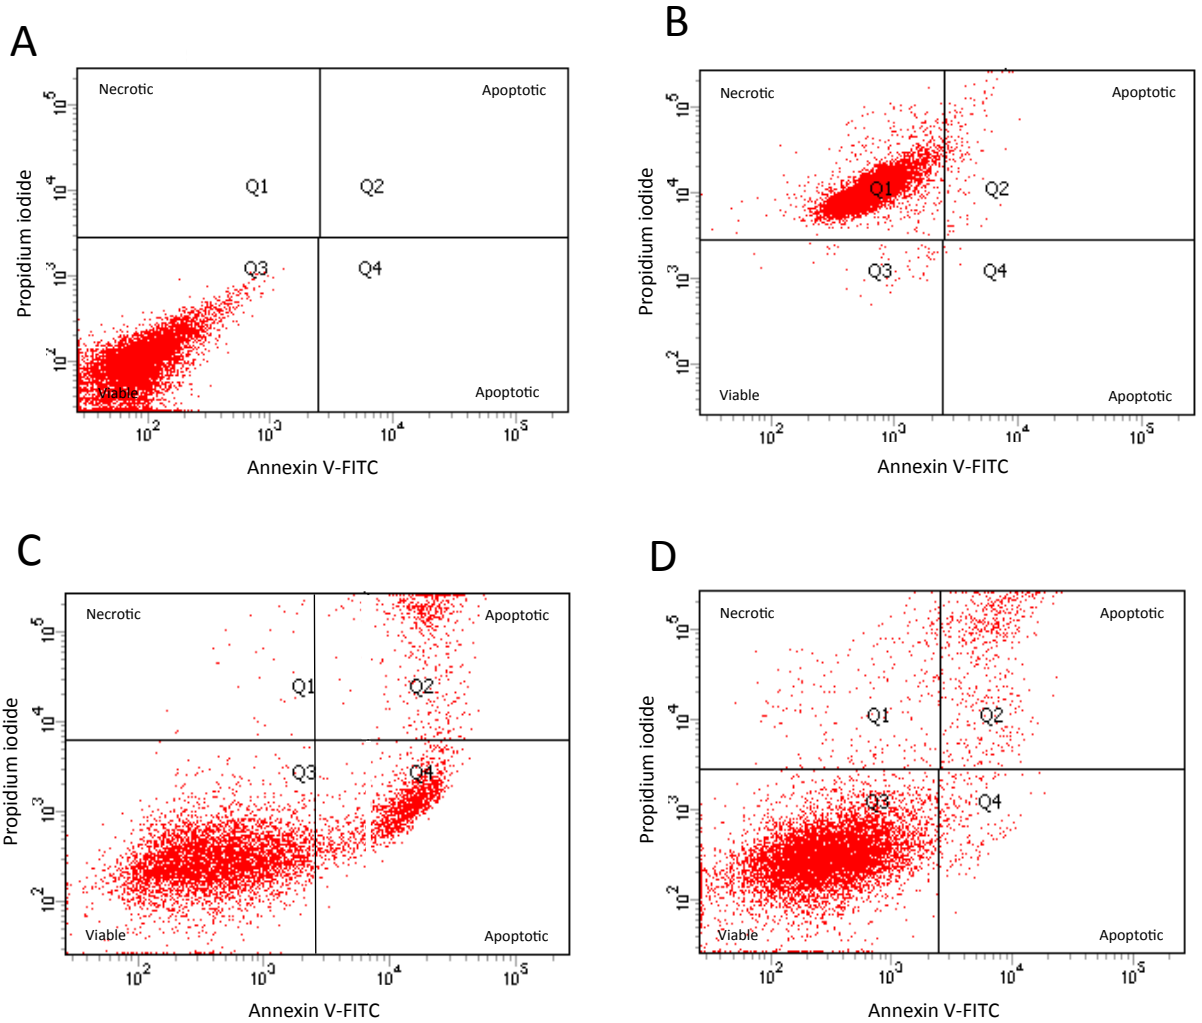

**Supplementary Figure 1. Flow cytometric gating strategy used to select apoptotic and necrotic cell populations.** UD-SCC2 or UPCI-SCC72 cells (red dots) cultured in complete or deplete methyl donor medium were stained with Annexin V-FITC and propidium iodide as described in the materials and methods and analysed by flow cytometry. (A) dot plot showing unstained, viable UD-SCC2 cells. (B) UD-SCC2 cells treated with 1% saponin in PBS as a positive control for necrosis (propidium iodide positive staining). (C) UD-SCC2 cells treated with camptothecin as a positive control for apoptosis (Annexin V-FITC positive staining). (D) UD-SCC2 cells cultured under 5% methyl donor conditions and analysed for levels of apoptosis, necrosis and cell viability.

## Supplementary Figure 2

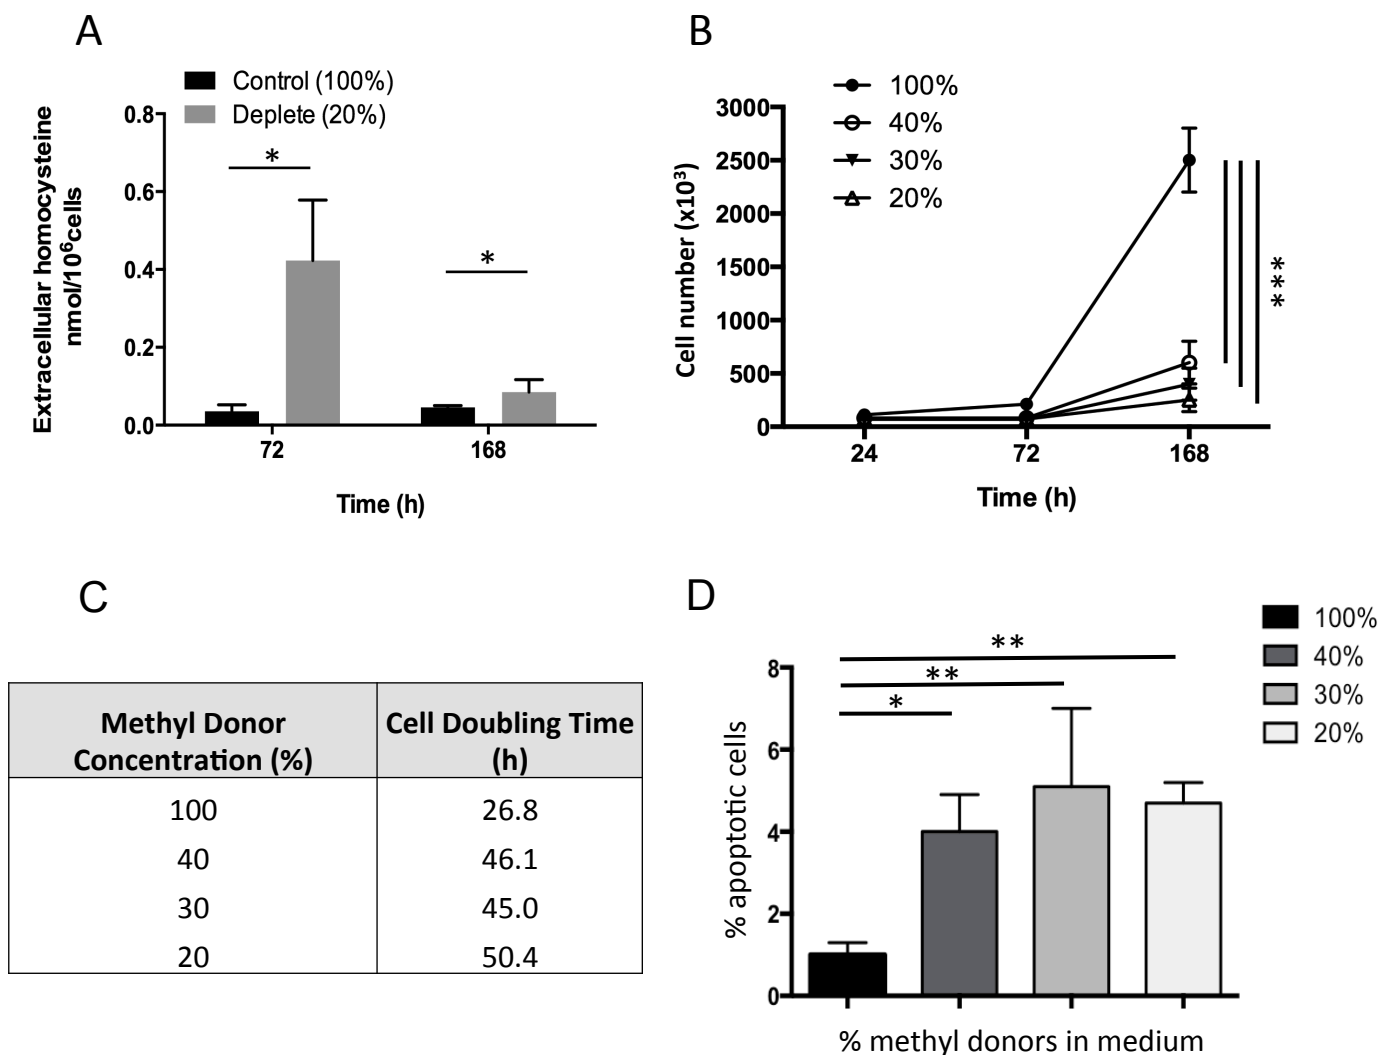

**Supplementary Figure 2. Effect of methyl donor depletion on UPCI-SCC72 cell growth, doubling time and apoptosis.** (A) Increased concentration of extracellular homocysteine in UPCI-SCC72 cells following 72 h and 168 h culture in depleted (20%) methyl donor medium compared to control cells (100%) Students-t test, \* $p < 0.05$  (B) Change in cell number and (C) cell doubling time for UPCI-SCC72 cells cultured in media containing three different levels of methyl donor depletion (20%, 30% and 40%) compared to cells grown in control media (100%). (D) Proportion of UPCI-SCC72 cells undergoing apoptosis (Annexin V-positive) following 168 h methyl donor depletion. All data are mean  $\pm$  SD,  $n=3$  independent experiments performed in triplicate. One-way independent ANOVA with Bonferonni post-hoc comparison. \* $p < 0.05$ , \*\* $p < 0.01$ , \*\*\* $p < 0.001$

## Supplementary Figure 3

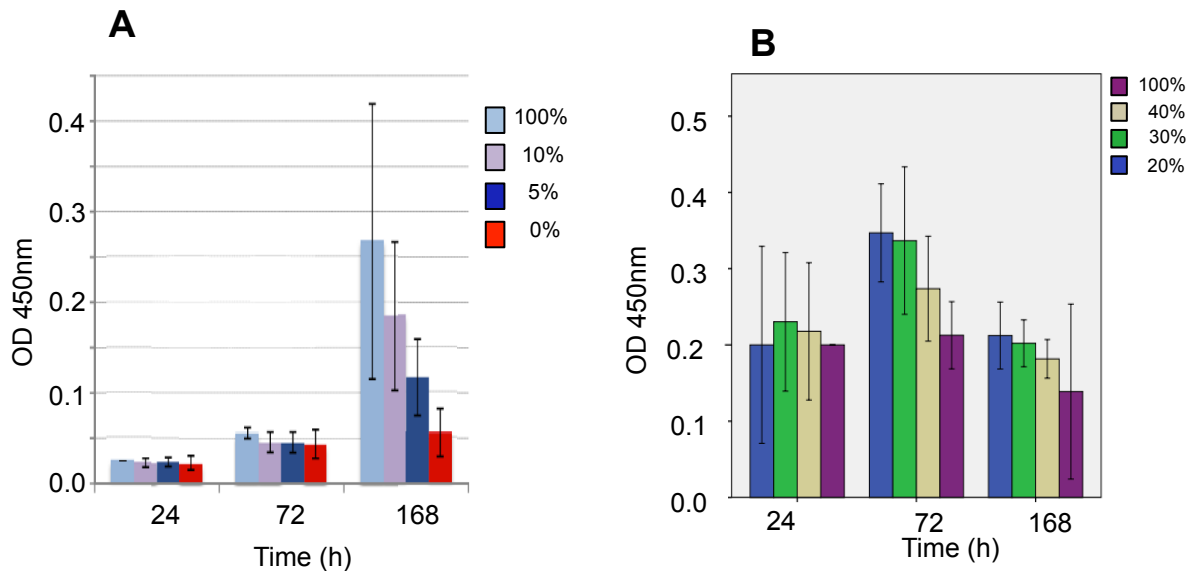

### Supplementary Figure 3. Effect of methyl donor depletion on cell metabolism.

No difference in the metabolic activity of UD-SCC2 (A) or UPCI-SCC72 (B) cells cultured in decreasing levels of methyl donors compared to cells grown in complete (100%) medium. The metabolic activity of cells was measured using MTT (3-(4,5-dimethylthiazol-2-yl)-2,5 diphenyl tetrazolium bromide). Cell monolayers were washed with PBS and MTT added for 40 minutes at 37°C, 5% CO<sub>2</sub>. MTT solution was removed and the intracellular formazan salt solubilised by addition of acidified isopropanol. The optical density of released dye was measured at 540 nm with a reference 630 nm. Data are mean  $\pm$  SD, n=3 independent experiments performed in triplicate.
